# How well do crop models predict phenology, with emphasis on the effect of calibration?

## Running head: Crop model phenology prediction

Wallach<sup>1</sup>, Daniel; Palosuo<sup>2</sup>, Taru; Thorburn<sup>3</sup>, Peter; Seidel<sup>4</sup>, Sabine J.; Gourdain<sup>5</sup>, Emmanuelle; Asseng<sup>6</sup>, Senthold; Basso<sup>7</sup>, Bruno; Buis<sup>8</sup>, Samuel; Crout<sup>9</sup>, Neil, M.J.; Dibari<sup>10</sup>, Camilla; Dumont<sup>11</sup>, Benjamin; Ferrise<sup>10</sup>, Roberto; Gaiser<sup>4</sup>, Thomas; Garcia<sup>7</sup>, Cécile; Gayler<sup>12</sup>, Sebastian; Ghahramani<sup>13</sup>, Afshin; Hochman<sup>3</sup>, Zvi; Hoek<sup>14</sup>, Steven; Horan<sup>3</sup>, Heidi; Hoogenboom<sup>6,15</sup>, Gerrit; Huang<sup>16</sup>, Mingxia; Jabloun<sup>9</sup>, Mohamed; Jing<sup>17</sup>, Qi; Justes<sup>18</sup>, Eric; Kersebaum<sup>19</sup>, Kurt Christian; Klosterhalfen<sup>20</sup>, Anne; Launay<sup>21</sup>, Marie; Luo<sup>22</sup>, Qunying; Maestrini<sup>7</sup>, Bernardo; Mielenz<sup>23</sup>, Henrike; Moriondo<sup>24</sup>, Marco; Nariman Zadeh<sup>25</sup>, Hasti; Olesen<sup>26</sup>, Jørgen Eivind; Poyda<sup>27</sup>, Arne; Priesack<sup>28</sup>, Eckart; Pullens<sup>26</sup>, Johannes Wilhelmus Maria; Qian<sup>17</sup>, Budong; Schütze<sup>29</sup>, Niels; Shelia<sup>6,15</sup>, Vakhtang; Souissi<sup>30,31</sup>, Amir; Specka<sup>19</sup>, Xenia; Srivastava<sup>4</sup>, Amit Kumar; Stella<sup>19</sup>, Tommaso; Streck<sup>12</sup>, Thilo; Trombi<sup>10</sup>, Giacomo; Wallor<sup>19</sup>, Evelyn; Wang<sup>16</sup>, Jing; Weber<sup>12</sup>, Tobias, K.D.; Weihermüller<sup>20</sup>, Lutz; de Wit<sup>14</sup>, Allard; Wöhling<sup>29,32</sup>, Thomas; Xiao<sup>33,6</sup>, Liujun; Zhao<sup>6</sup>, Chuang; Zhu<sup>33</sup>, Yan

<sup>1</sup> INRA, UMR AGIR, Castanet Tolosan, France. ORCID 0000-0003-3500-8179

<sup>2</sup> Natural Resources Institute Finland (Luke), Helsinki, Finland

<sup>3</sup> CSIRO Agriculture and Food, Brisbane, Queensland, Australia

<sup>4</sup> Institute of Crop Science and Resource Conservation, University of Bonn, Germany

<sup>5</sup> ARVALIS - Institut du végétal Paris, France

<sup>6</sup> Agricultural and Biological Engineering Department, University of Florida, Gainesville, Florida

<sup>7</sup> Department of Earth and Environmental Sciences, Michigan State University, East Lansing, Michigan

<sup>8</sup> INRA, UMR 1114 EMMAH, Avignon, France

<sup>9</sup> School of Biosciences, University of Nottingham, Loughborough, UK

<sup>10</sup> Department of Agriculture, Food, Environment and Forestry (DAGRI), University of Florence, Italy

<sup>11</sup> Department Terra & AgroBioChem, Gembloux Agro-Bio Tech, University of Liege, Gembloux, Belgium

<sup>12</sup> Institute of Soil Science and Land Evaluation, Biogeophysics, University of Hohenheim, Stuttgart, Germany

<sup>13</sup> Centre for Sustainable Agricultural Systems, Institute for Life Sciences and the Environment, University of Southern Queensland, Toowoomba, Queensland, Australia

<sup>14</sup> Environmental Sciences Group, Wageningen University & Research, Wageningen, The Netherlands

<sup>15</sup> Institute for Sustainable Food Systems, University of Florida, Gainesville, Florida

<sup>16</sup> College of Resources and Environmental Sciences, China Agricultural University, Beijing, China

<sup>17</sup> Ottawa Research and Development Centre, Agriculture and Agri-Food Canada, Ottawa, Canada

<sup>18</sup> CIRAD, UMR SYSTEM, Montpellier, France

<sup>19</sup> Leibniz Centre for Agricultural Landscape Research, Müncheberg, Germany

<sup>20</sup> Institute for Bio- and Geosciences - IBG-3, Agrosphere, Forschungszentrum Jülich GmbH, Jülich, Germany

<sup>21</sup> INRA, US 1116 AgroClim, Avignon, France

<sup>22</sup> Hillridge Technology Pty Ltd, Sydney, Australia

<sup>23</sup> Institute for Crop and Soil Science, Federal Research Centre for cultivated Plants, Julius Kühn-Institut (JKI), Braunschweig, Germany

<sup>24</sup> CNR-IBIMET, Firenze, Italy

<sup>25</sup> Aalto University School of Science, Espoo, Finland

<sup>26</sup> Department of Agroecology, Aarhus University, Tjele, Denmark

<sup>27</sup> Grass and Forage Science / Organic Agriculture, Institute of Crop Science and Plant Breeding, Kiel University, Kiel, Germany

<sup>28</sup> Institute of Biochemical Plant Pathology, Helmholtz Zentrum München-German Research Center for Environmental Health, Neuherberg, Germany

<sup>29</sup> Institute of Hydrology and Meteorology, Chair of Hydrology, Technische Universität Dresden, Dresden, Germany

<sup>30</sup> National Institute of Agronomic Research of Tunisia (INRAT), Agronomy Laboratory, University of Carthage, Tunis, Tunisia

<sup>31</sup> National Agronomy Institute of Tunisia (INAT), University of Carthage, Tunis, Tunisia

<sup>32</sup> Lincoln Agritech Ltd., Hamilton, New Zealand

<sup>33</sup> National Engineering and Technology Center for Information Agriculture, Jiangsu Key Laboratory for Information Agriculture, Jiangsu Collaborative Innovation Center for Modern Crop Production, Nanjing Agricultural University, Nanjing, Jiangsu, China

## 16 ABSTRACT

17 Plant phenology, which describes the timing of plant development, is a major aspect of  
18 plant response to environment and for crops, a major determinant of yield. Since climate  
19 change is projected to alter crop phenology worldwide, there is a large effort to predict  
20 phenology as a function of environment. Many studies have focused on comparing model  
21 equations for describing how phenology responds to weather but the effect of crop model  
22 calibration, also expected to be important, has received much less attention. The objective  
23 here was to obtain a rigorous evaluation of prediction capability of wheat crop phenology  
24 models, and to analyze the role of calibration. The 27 participants in this multi-model study  
25 were provided experimental data for calibration and asked to submit predictions for sites and  
26 years not represented in those data. Participants were instructed to use and document their  
27 “usual” calibration approach. Overall, the models provided quite good predictions of  
28 phenology (median of mean absolute error of 6.1 days) and did much better than simply using  
29 the average of observed values as predictor. Calibration was found to compensate to some  
30 extent for differences between models, specifically for differences in simulated time to  
31 emergence and differences in the choice of input variables. Conversely, different calibration  
32 approaches led to major differences in prediction error between models with the same  
33 structure. Given the large diversity of calibration approaches and the importance of  
34 calibration, there is a clear need for guidelines and tools to aid with calibration. Arguably the  
35 most important and difficult choice for calibration is the choice of parameters to estimate.  
36 Several recommendations for calibration practices are proposed. Model applications,  
37 including model studies of climate change impact, should focus more on the data used for  
38 calibration and on the calibration methods employed.

## 39 Introduction

40 Global change is placing unprecedented pressure on food security (Campbell et al.,  
41 2018; Godfray et al., 2010; Wheeler & von Braun, 2013). The search for ways to increase the  
42 volume and efficiency of food production needs to account for the effects of climate change  
43 on agricultural production systems (Porter, Howden, & Smith, 2017). Modeling is an  
44 important tool in projecting and understanding the trajectory of food production under future  
45 climates (Asseng et al., 2019; Bindi, Palosuo, Trnka, & Semenov, 2015; Carberry et al.,  
46 2013; Hochman, Gobbett, & Horan, 2017; Parry, Rosenzweig, Iglesias, Livermore, & Fischer,  
47 2004). One of the likely effects of climate change will be an increase in air temperature  
48 (IPCC, 2014). Temperature directly affects plant growth through a number of pathways, one  
49 of which is phenology (Went, 2003). Phenology describes the cycles of biological events in  
50 plants. These events include seedling emergence, leaf appearance, and flowering. Matching  
51 the phenology of crop varieties to the climate in which they grow is a critical crop production  
52 strategy (Hunt et al., 2019; Rezaei, Siebert, & Ewert, 2015; Rezaei, Siebert, Hüging, & Ewert,  
53 2018). Thus, understanding and improving our ability to simulate phenology with crop  
54 models is an important activity in preparing for and adapting to global change. Process-based  
55 models similar to those for crops can be used for natural vegetation, so crop models can serve  
56 as examples for studies of phenology in ecosystems (Piao et al., 2019).

57 Crop model evaluation is an essential aspect of modeling, assessing whether model  
58 performance is acceptable for the intended use of the model. For studies of phenology two  
59 major questions are a) how accurate are current models for the prediction of crop  
60 development stages? and b) what determines model accuracy and what does that imply about  
61 how accuracy can be improved? We use here prediction in the sense of determining outputs

62 (dates of development stages) from known inputs (weather, soil, management). The problem  
63 of predicting future events, with unknown weather, is not considered.

64 There have been numerous evaluation studies of crop model simulations, including but  
65 not restricted to phenology, both of individual models and of multi-model ensembles. The  
66 typical procedure is to first calibrate the model using a part of the available field data and then  
67 to evaluate it using the remaining data. Most crop model evaluation studies focusing on crop  
68 phenology have had relatively little data for calibration or evaluation. (Andarzian,  
69 Hoogenboom, Bannayan, Shirali, & Andarzian, 2015) for example, used data from one  
70 location covering five growing seasons and two or three sowing dates per year. Out of these  
71 data, one year was used for calibration and the other two years of data to evaluate the model.  
72 (Yuan, Peng, & Li, 2017) used one year of data for calibration and the second year of data  
73 from the same location for evaluation of the rice crop model ORYZA. Hussain, Khaliq,  
74 Ahmad, & Akhtar (2018) tested four models using data from two locations with two years of  
75 data, 11 crop planting dates, and three varieties. Paucity of data means that model parameters  
76 are estimated with relatively large uncertainty and model evaluation is quite uncertain.

77 Another common feature of crop model evaluation is that the data are often such that  
78 model error for the evaluation data cannot be assumed to be independent of model error for  
79 the calibration data. That holds for the examples listed above since the evaluation and  
80 calibration data come from the same sites. In such cases, the evaluation does not give an  
81 unbiased estimate of how well the model will predict for other sites not included in the  
82 calibration data. Since usually the model is meant for use over a range of sites, this clearly  
83 reduces the usefulness of the evaluation information.

84 A third feature often found in crop model evaluation is that the range of situations  
85 from which the calibration data are drawn (the “training population”) is often different than  
86 the range of conditions from which the evaluation data are drawn (the “evaluation  
87 population”). For example, Hussain et al. (2018) used data from an experiment that included a  
88 range of crop stresses to calibrate their model. They used data from the least stressed  
89 treatment in the calibration process and evaluated the resultant model on the remaining  
90 planting dates at the same location. The evaluation data thus represented a different range of  
91 conditions than the calibration data. In a multi-model ensemble study of the effect of high  
92 temperatures on wheat growth (S. Asseng et al., 2015) detailed crop measurements were  
93 provided for one planting date and the models were evaluated using other planting dates,  
94 some with additional artificial heating. Again, the evaluation data represented a much larger  
95 range of temperatures than represented in the calibration data. While the capacity of crop  
96 models to extrapolate to conditions quite different than those of the calibration data is  
97 obviously of interest, it is a rather different type of evaluation than the case where the training  
98 and evaluation populations are similar.

99 Thus, evaluation of crop phenology models to date has mainly concerned situations  
100 that would tend to make prediction difficult, because of small amounts of data for calibration  
101 and differences between the training and target populations. Furthermore, the quality of the  
102 evaluation is often questionable, because of the relatively small amounts of data and the non-  
103 independence of the errors for the calibration and evaluation situations. There is thus a need  
104 for more rigorous assessments of simulation capability of crop phenology models in the well-  
105 defined situation where the calibration and evaluation data can be assumed to come from the  
106 same underlying population. The first objective of this paper is, therefore, to evaluate how  
107 well crop models predict wheat phenology in such a case. To ensure the rigor of the

108 evaluation, we create a situation where the model errors for the calibration and simulation  
109 data can be assumed independent.

110 The emphasis in model evaluation studies is often on the role of model structure, i.e.  
111 model equations (Maiorano et al., 2017; Svystun, Bhalerao, & Jönsson, 2019; Wang et al.,  
112 2017), and not on model calibration. Clearly however the simulated values depend on the  
113 parameter values estimated by calibration and therefore on the calibration approach.  
114 (Confalonieri et al., 2016) found that the model user, responsible for calibration, had a very  
115 large effect on predictive quality. In a wide-ranging survey, (Seidel, Palosuo, Thorburn, &  
116 Wallach, 2018) found that there is a wide diversity of calibration strategies used for crop  
117 models. The second objective of this study was therefore to obtain detailed information about  
118 the calibration strategies in use for phenology models and to better understand the effect of  
119 calibration methodology in determining predictive capability for phenology. This is of  
120 practical interest not only for stand-alone phenology models, but also for crop models more  
121 generally, since crop models are often calibrated first just for phenology, and then separately  
122 for biomass increase and partitioning and soil processes.

## 123 Materials and Methods

### 124 **Experimental data**

125 The data were provided by ARVALIS – Institut du végétal, a French agricultural  
126 technical institute. They run multi-year multi-purpose trials at multiple locations across  
127 France, which include variety trials. The data here are from the two check varieties, *Apache*  
128 which is a common variety grown throughout France and Central Europe and *Bermude*,  
129 mainly grown in Northern and Central France. The trials have three repetitions and follow  
130 standard agricultural practices, with N fertilization calculated to be non-limiting. Thus, both  
131 the calibration and evaluation data are drawn from sites in France where winter wheat is  
132 grown, subject to standard management.

133 The observed data used in model calibration and evaluation are the dates of two  
134 development stages, namely beginning of stem elongation (growth stage 30 on the BBCH and  
135 Zadoks scales (Zadoks, Chzang, & Konzak, 1974) and middle of heading (growth stage 55 on  
136 the BBCH and Zadoks scales). These stages are of practical importance because they can  
137 easily be determined visually and are closely related to the recommended dates for the second  
138 and third nitrogen fertilizer applications.

139 The data were divided into three categories (table 1). One part, the calibration data (14  
140 environments i.e. site-year combinations), was provided to participants for calibration. A  
141 second part, the evaluation data (eight environments), was not given to participants. The  
142 division of the data was such that the calibration and evaluation data had no sites or years in  
143 common. The only way to achieve this was have a third category, “other” (from 13  
144 environments), with data that were not revealed to participants but were used neither for  
145 calibration nor evaluation. These environments had either the site or the year in common with  
146 the calibration data. Errors for these environments cannot be assumed to be independent of  
147 errors for the calibration data, and so they were not used for evaluation. All conclusions about  
148 predictive capability are based on the evaluation data. The individual observed values for the  
149 evaluation and other hidden data are not presented here because they will be used again in a  
150 subsequent study where all groups will be asked to use the same calibration approach.

151

152

153 **Table 1.**

154 **Environments (site-year combinations) that provided the data. C= calibration data. E =**  
 155 **evaluation data. O = other hidden data.**

| Site<br>(longitude,latitude)            | Harvest year |      |      |      |      |      |      |
|-----------------------------------------|--------------|------|------|------|------|------|------|
|                                         | 2010         | 2011 | 2012 | 2013 | 2014 | 2015 | 2016 |
| FORESTE<br>(3.20,49.82)                 |              |      | E    | E    | OO*  | O    |      |
| MERY<br>4.02,48.33)                     | C            | C    |      | O    | C    | C    |      |
| ROUVRES<br>5.09,47.28)                  |              |      | E    | E    | O    | O    |      |
| CESSEVILLE <sup>1</sup><br>(0.90,49.15) |              | C    |      |      |      |      |      |
| IVILLE <sup>1</sup><br>(0.90,49.15)     |              |      | E    |      |      |      |      |
| VILLETES <sup>1</sup><br>(0.90,49.15)   |              |      |      | E    |      |      |      |
| EPREVILLE <sup>1</sup><br>(0.90,49.15)  |              |      |      |      | C    |      |      |
| CRESTOT <sup>1</sup><br>(0.90,49.15)    |              |      |      |      |      | C    |      |
| OUZOUER<br>(1.52,47.90)                 |              | O    | E    | E    | O    | O    |      |
| BIGNAN<br>(-2.73,47.88)                 | C            | C    | O    | O    | C    | C    |      |
| BOIGNEVILLE<br>(2.38,48.33)             |              |      | O    | O    | C    | C    | C    |

156

157 \*There were two sowing dates at FORESTE in 2014. <sup>1</sup> These are separate sites that are  
 158 geographically close to one another and share a single weather station.

159

160 The background and input information provided to the modelers for all environments  
 161 included information about the sites (location, soil texture, field capacity, wilting point),  
 162 management (sowing dates, sowing density, irrigation and fertilization dates and amounts),  
 163 and daily weather data (precipitation, minimum and maximum air temperature, global  
 164 radiation and potential evapotranspiration). Initial soil water and N content were not measured

165 in these experiments, but best guesses were provided by the experimental scientist. If any  
166 models required other input data, modeling groups were asked to derive those values in  
167 whatever way that seemed appropriate.

168 The range of observed days from sowing to development stages BBCH30 and  
169 BBCH55 for the two varieties for each category of data (calibration, evaluation, other hidden  
170 data) is shown in figure 1. The spread from minimum to maximum in the evaluation data is  
171 between 24 and 27 days depending on stage and variety. The spread is larger for the  
172 calibration data, and in fact, the calibration data cover the range of the evaluation data and the  
173 range of other hidden data. Thus, the models are not being used to extrapolate outside the  
174 observed values of the calibration data.

175

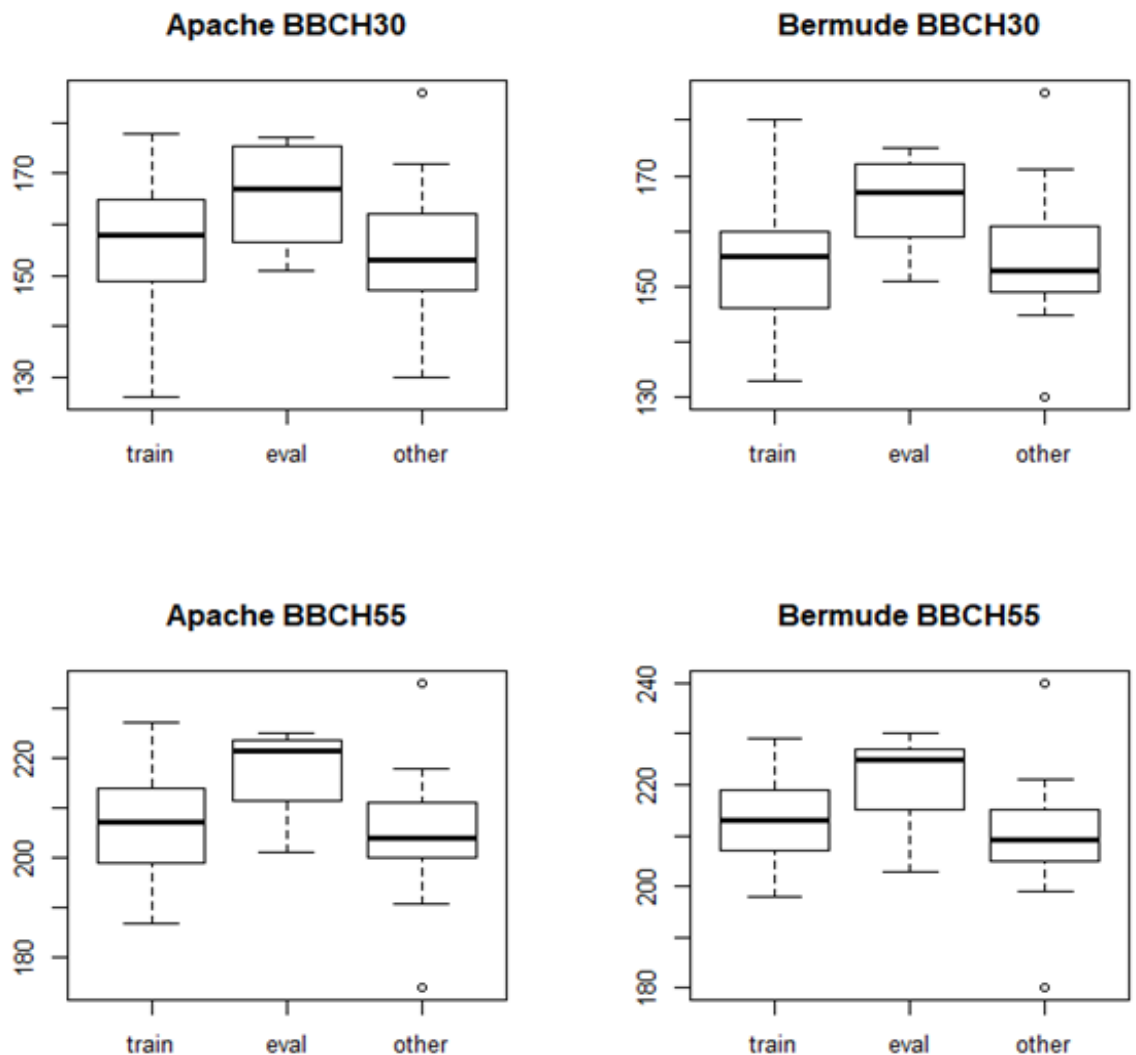

176

177 **Figure 1**

178 **Boxplots of calibration, evaluation and other data for development stages**  
179 **BBCH30 and BBCH50 and varieties Apache and Bermude. The y-axis shows days from**  
180 **sowing to the indicated development stage. Boxes indicate the lower and upper quartiles.**



181 **The solid line within the box is the median. Whiskers indicate the most extreme data**  
182 **point, which is no more than 1.5 times the interquartile range from the box, and the**  
183 **outlier dots are those observations that go beyond that range.**

184  
185

## 186 **Crop models**

187 Twenty-seven modeling groups participated in this study, noted M1-M27. The four  
188 groups M2, M3, M4, and M5 all used the same model structure (i.e. models with the same  
189 name), denoted as model structure S1. The four models M7, M12, M13, and M25 also shared  
190 a common model structure, denoted as S2. As will be seen, different groups using the same  
191 model structure had different results. The model versions for the same model structure  
192 differed in some cases, but the differences are not in the basic phenology equations  
193 implemented, and therefore, should have no or only a negligible effect on the simulated  
194 development stages. Some differences in results may have resulted from different values for  
195 the parameters that were not fit to the calibration data, although this was not recorded. The  
196 differences in calibration approach were recorded, and this certainly led to differences in  
197 simulated values. Since even groups using the same model structure obtained different results,  
198 we refer to the 27 contributions as different models. In the presentation of the results the  
199 models are anonymized and are identified simply as M1 to M27. It would be misleading to  
200 use the names of the model structures, since the results depend on both model structure and on  
201 the approach to calibration. Information about the model structures is given in Supplementary  
202 table S1.

203 Two of the models (M9, M18) only simulated days to development stage BBCH55  
204 and not to stage BBCH30. Results for these two models are systematically included with the  
205 results for the other models, but averages over development stages for these two models only  
206 refer to BBCH55. This is not repeated explicitly every time an average over development  
207 stages is discussed.

208 In addition to the individual model results, we show the results for the model ensemble  
209 mean (“e-mean”) and the model ensemble median (“e-median”). We also define a very simple  
210 predictor, denoted “naive”, which was calculated as the average of the observations in the  
211 calibration data for prediction. The naive model thus predicts that all days from sowing to  
212 stage BBCH30 (BBCH55) will correspond to the average of days from sowing to BBCH30  
213 (BBCH55) in the calibration data, separately for each variety. The naive model predictions for  
214 days from sowing to BBCH30 and BBCH55 are respectively 155.9 days and 206.9 days for  
215 variety Apache, and 156.1 days and 213.1 days for variety Bermude.

## 216 **Calibration and simulation experiment**

217 The participants were provided with observed phenology data (dates of BBCH30 and  
218 BBCH55) only for the calibration environments. The participants were asked to calibrate their  
219 model using those data, and then to use the calibrated model to simulate phenology for all  
220 environments (i.e. calibration, evaluation and hidden data environments). No guidelines for  
221 calibration were provided. Participants were instructed to calibrate their model in their “usual  
222 way” and fill out a questionnaire explaining what they did (Supplementary table S2).

## 223 **Evaluation**

224 A common metric of error is mean squared error (MSE). We calculated MSE for each  
225 model, each development stage (BBCH30 and BBCH55) and for each variety, as well as  
226 averaged over stages and varieties. This was done separately for the calibration and evaluation

227 data. For example, MSE for model  $m$ , for predicting BBCH30, variety Apache, based on the  
228 evaluation data, is:

$$229 \quad MSE_{eval,m}^{BBCH30,Apache} = (1/8) \sum_{i \in eval} \left( y_i^{BBCH30,Apache} - \hat{y}_{i,m}^{BBCH30,Apache} \right)^2 \quad (1)$$

230  
231 where the sum is over the eight environments used for evaluation and  $y_i^{BBCH30,Apache}$  and  
232  $\hat{y}_{i,m}^{BBCH30,Apache}$  are respectively the observed value and value simulated by model  $m$  for  
233 evaluation environment  $i$ , development stage BBCH30 and variety Apache. For  $MSE_{eval,m}^{all}$ , the  
234 average is over the eight evaluation environments, both stages and both varieties, so overall  
235 32 predictions.

236 Mean squared error can be shown to be the sum of three positive terms, namely  
237 squared bias, the difference in variance between the observed and simulated values and a term  
238 related to the correlation between observed and simulated values (Kobayashi & Salam, 2000).  
239 We specifically examined the bias, defined as the average over observed values minus the  
240 average over simulated values.

241 The mean absolute error (MAE) is of interest as a more direct measure of error, that  
242 does not give extra weight to large errors as MSE does. For example, MAE for model  $m$  for  
243 predicting BBCH30, variety Apache, based on the evaluation data, is:

$$244 \quad MAE_{eval,m}^{BBCH30,Apache} = (1/8) \sum_{i \in eval} \left| y_i^{BBCH30,Apache} - \hat{y}_{i,m}^{BBCH30,Apache} \right|$$

245

246 We also look at modeling efficiency (EF) defined for model  $m$  as

$$247 \quad EF_m = 1 - MSE_m / MSE_{naive}$$

248 where  $MSE_m$  is MSE for model  $m$  and  $MSE_{naive}$  is MSE for the naive model defined above.  
249 EF is a skill measure, which compares the predictive capability of a model to that of the naive  
250 model. Since the naive model makes the same prediction for all environments, it does not  
251 account for any of the variability between environments. A model with  $EF \leq 0$  is a model that  
252 does no better than the naive model, and so would be considered to be a very poor predictor.  
253 A perfect model, with no error, has modeling efficiency of 1.

254

## 255 Results

### 256 Goodness-of-fit and prediction error

257 Summary statistics for MSE averaged over both varieties and over both development  
258 stages, for the calibration and evaluation data, are shown in table 2. Summary MSE values for  
259 the calibration data for each development stage and variety separately are shown in  
260 Supplementary table S7, and results for each individual model are given in Supplementary  
261 figure S1.

262 **Table 2**



263 **Summary statistics of MSE (days<sup>2</sup>) averaged over both varieties and over both**  
264 **development stages.**

| MSE (days <sup>2</sup> ) | Minimum | 1st quartile | Median | Mean | 3rd quartile | Maximum |
|--------------------------|---------|--------------|--------|------|--------------|---------|
| Calibration data         | 15      | 28           | 47     | 77   | 63           | 426     |
| Evaluation data          | 20      | 35           | 62     | 79   | 111          | 235     |

265

266 In most cases, the bias for the calibration data is quite small. Considering absolute bias  
267 for both development stages and both varieties, the median value was 2 days (Supplementary  
268 table S8). In cases where the bias is relatively large, it is often of opposite sign for BBCH30  
269 and BBCH55, as in the examples of figure 2.

270

271

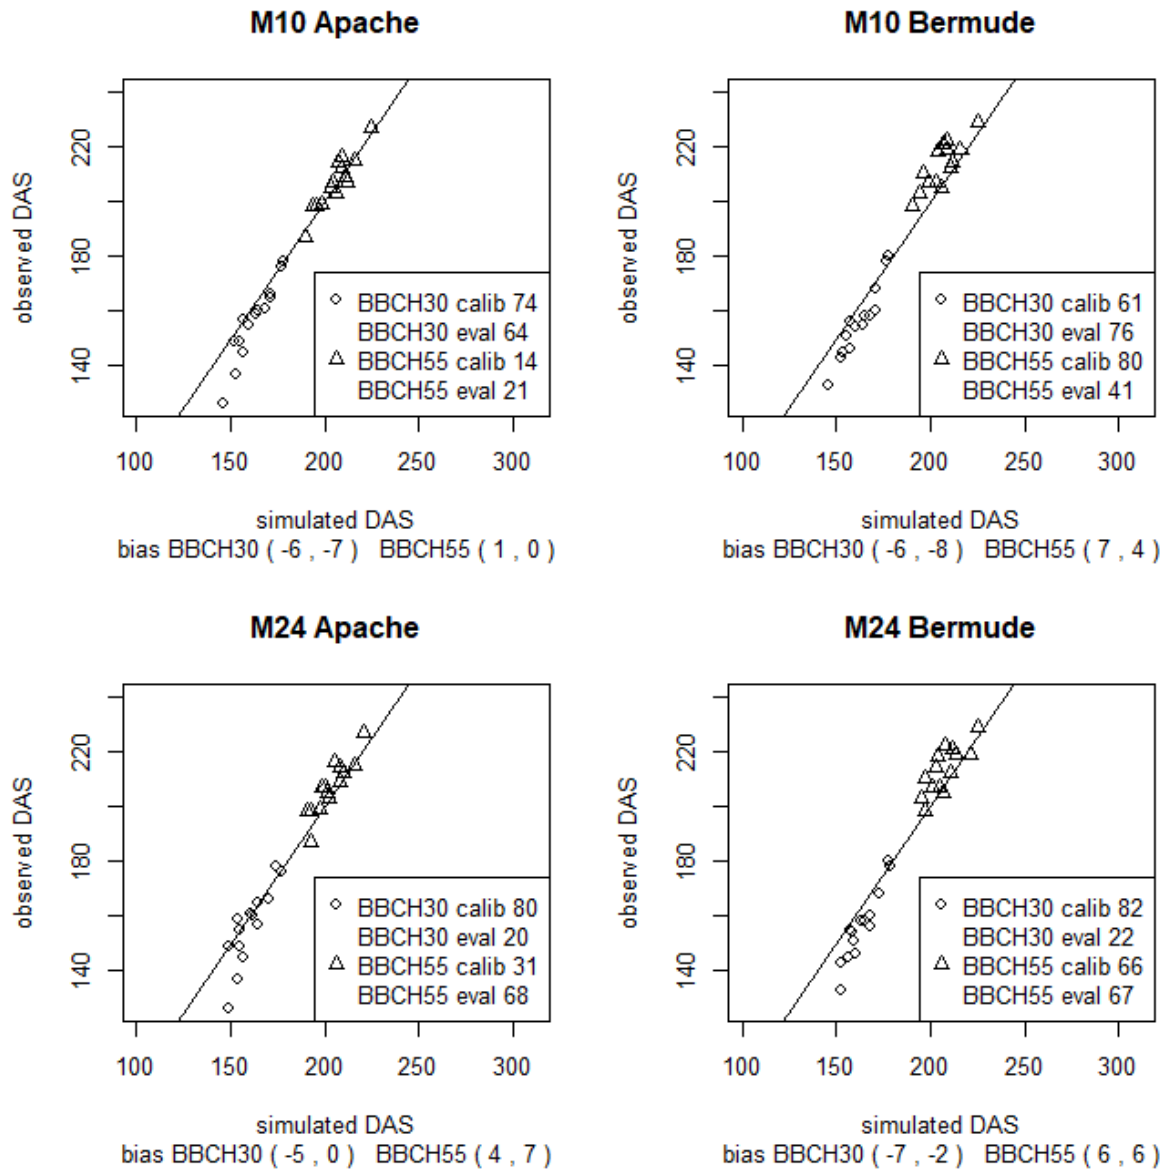

272

273

## Figure 2

274

275 **Observed vs. simulated days after sowing (DAS) for calibration data for models**  
276 **M10 and M24. The legend shows MSE (days<sup>2</sup>) for each stage and for calibration and**  
277 **evaluation data. (The individual evaluation results are not displayed). In the subtitles,**  
278 **bias values (days) for each stage are shown. The first number in parentheses is for the**  
279 **calibration data, the second number is for the evaluation data.**

279

280

281 Figure 3 and Supplementary tables S4-S6 show results for each development stage and  
282 variety and averaged over development stages and varieties for the evaluation data. Results  
283 for each model are given in Supplementary table S3. The median of MAE for the evaluation  
284 data is 6.1 days. The median of overall efficiency is 0.62, signifying that half of the models  
285 have MSE values for the evaluation data that are at most 38% as large as that of the naive  
286 predictor. Only two models have negative values of EF, indicating that one would do better  
to predict using the average of the calibration data. For the four individual predictions (two

287 development stages, two varieties), the median of MAE ranges from 5.1 to 6.4 and the median  
288 of EF ranges from 0.6 to 0.8. The ensemble models e-median and e-mean, though not the best  
289 predictors, are among the best, with e-median being rated second best and e-mean fourth best.  
290 The range of results among individual models is appreciable. The mean absolute errors for the  
291 evaluation data averaged over all predictions ( $MAE_{eval}^{all}$ ) go from 3.5 to 13 days. The  $MSE_{eval}^{all}$   
292 values vary by over a factor of 10, from a minimum of 20 days<sup>2</sup> to a maximum of 235 days<sup>2</sup>.  
293

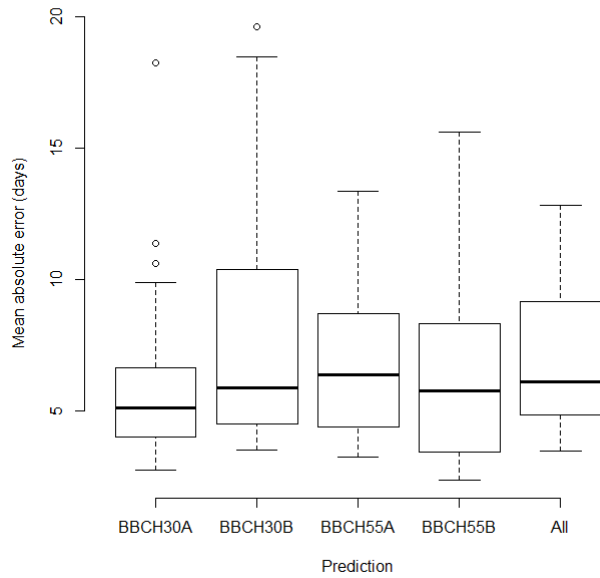

294  
295  
296

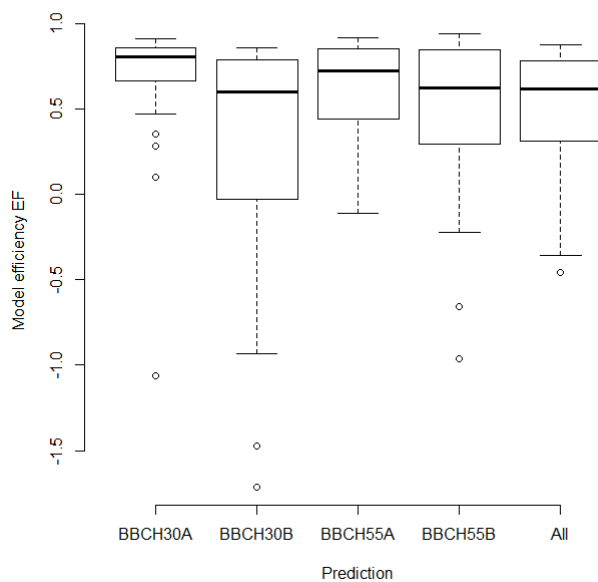

297  
298

**Figure 3**

299 **Box and whisker diagrams of absolute errors for evaluation data for each**  
300 **prediction and on average (top panel) and modeling efficiency for each prediction and**  
301 **on average (bottom panel). BBCH30A and BBCH30B refer respectively to prediction of**  
302 **days to BBCH30 for variety Apache and variety Bermude. BBCH55A and BBCH55B**  
303 **refer respectively to prediction of days to BBCH55 for variety Apache and variety**  
304 **Bermude. The variability comes from differences between models.**

305

306

307 The relationship between overall MSE for the evaluation data and overall MSE for the  
308 calibration data is quite close (adjusted  $R^2=0.70$ , figure 3). That is, much of the variability  
309 between models in MSE for the evaluation data can be explained by the variability in the  
310 calibration data, which further emphasizes the importance of calibration.

311 The four models that have model structure S1 and the four models that have model  
312 structure S2 are identified in figure 4. Models with the same structure have different MSE  
313 values; the differences are particularly large for S1. The models with structure S1 are ranked  
314 3rd, 9th, 14th and 27th best for overall evaluation MSE among the 27 individual models. The  
315 models with structure S2 are ranked 4th, 8th, 17th and 18<sup>th</sup> est.

316

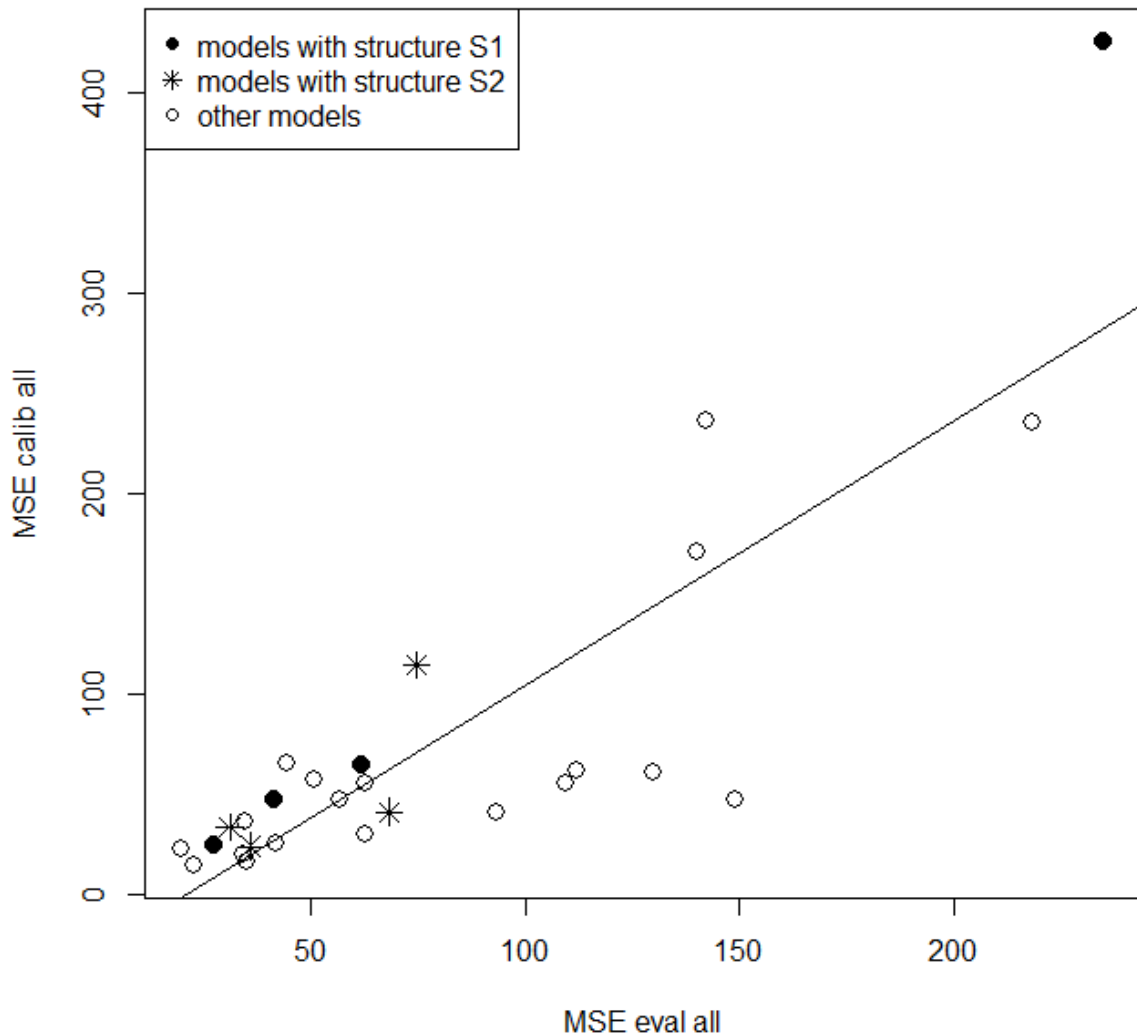

317

318

**Figure 4**

319

320

321

322

323

324

325

326

327

328

329

330

331

Mean squared error (MSE) for the calibration data, averaged over environments, development stages and varieties ( $MSE_{calib}^{all}$  days<sup>2</sup>), as related to MSE for the evaluation data ( $MSE_{eval}^{all}$ , days<sup>2</sup>). The regression line  $MSE_{calib}^{all} = -27.6 + 1.32 MSE_{eval}^{all}$  is shown ( $R^2=0.70$ ). ● indicates models with structure S1. \* indicates models with structure S2. ○ indicates other models.

Twenty-one models simulated and reported time from sowing to emergence. For these models, we can separate simulated time from sowing to BBCH30 (sow\_30) into two contributions, the simulated time from sowing to emergence (sow\_em) plus the simulated time from emergence to BBCH30 (em\_30), so that  $sow\_30 = sow\_em + em\_30$ . Figure 5 shows results from two environments, typical of essentially all environments and both varieties, for the relation between em\_30 or sow\_30 and sow\_em. The average slope of the regression  $em\_30 = a + b * sow\_em$  over all environments (including calibration, evaluation and other

332 environments) and both varieties is  $b=-1.04$ , so that each day increase in simulated days to  
333 emergence is on average associated with a 1.04 day decrease in simulated time from  
334 emergence to BBCH30. The negative correlation between `sow_em` and `em_30` leads to a  
335 between-model variance for `sow_30` (average variance 92 days<sup>2</sup>) that is smaller than the sum  
336 of the variances of `sow_em` (average variance 20 days<sup>2</sup>) and `em_30` (average variance 101  
337 days<sup>2</sup>). The right panels of figure 5 show that different models could simulate almost exactly  
338 the observed value of `sow_30` with quite different values of `sow_em`.

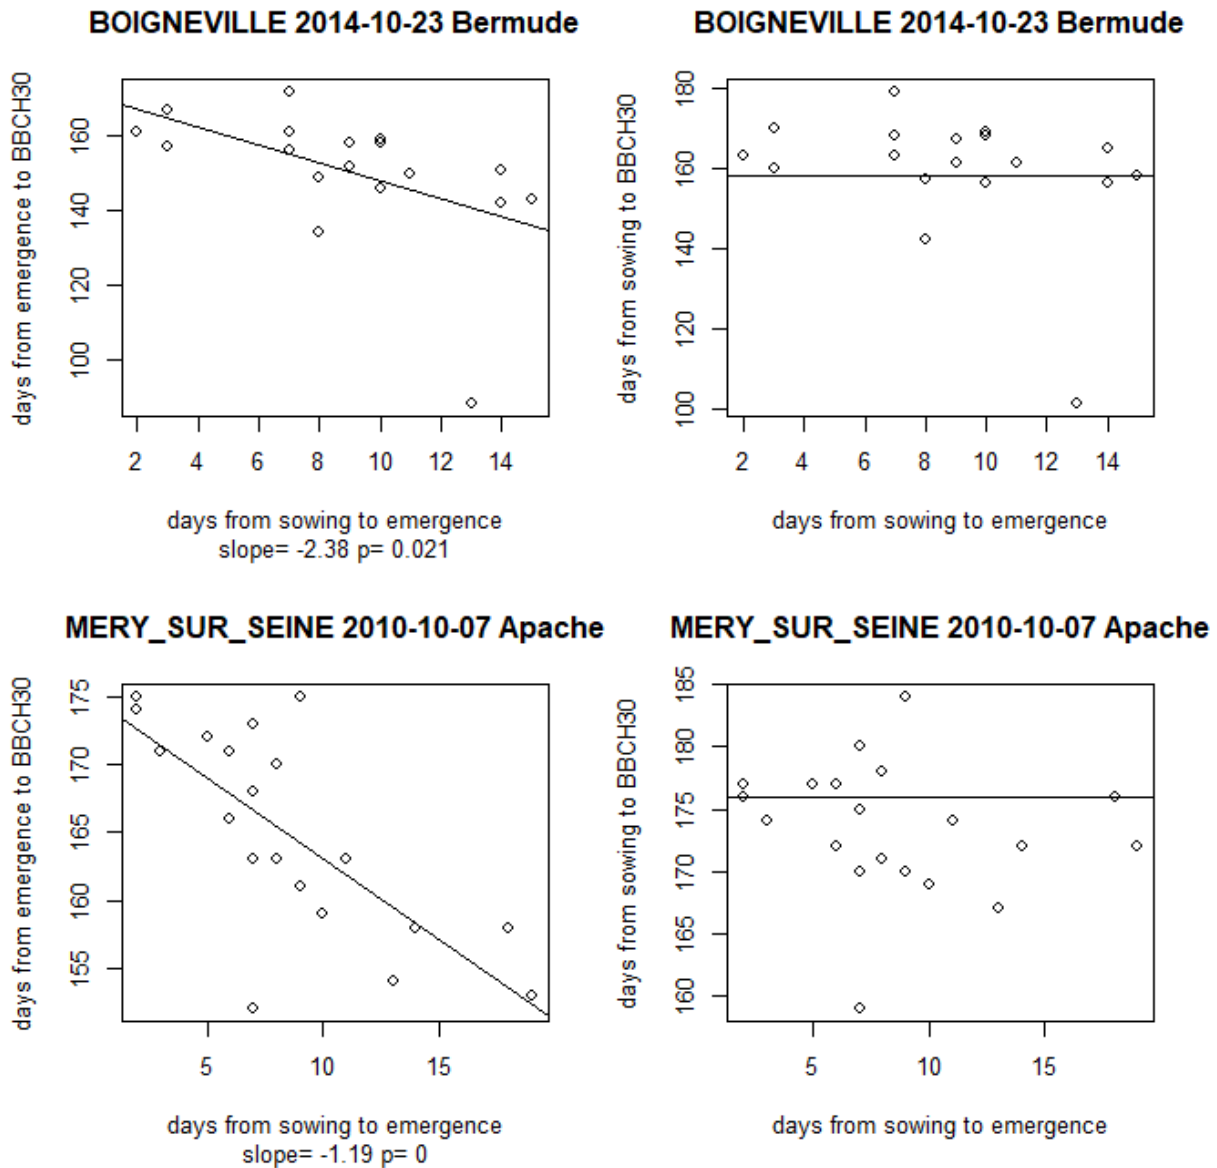

339

340

**Figure 5**

341 **Relation between simulated days from emergence to BBCH30 and simulated days**  
342 **from sowing to emergence as reported by 21 crop models for two environments (left**  
343 **panels). Relation between simulated days from sowing to BBCH30 and simulated days**  
344 **from sowing to emergence for the same environments (right panels). The slope of the**  
345 **linear regression line and the p-value for testing slope=0 are shown for the left panels.**  
346 **The observed days from sowing to BBCH30 is shown as a horizontal line in the right**  
347 **panels.**



348 **Calibration approaches**

349 Each participant was asked to calibrate the model in the “usual” way, using the  
 350 calibration data provided. The questionnaire about calibration focused on three aspects of  
 351 calibration; the choice of parameters to estimate, the criterion of error to be minimized and the  
 352 software used. The choices of the participants are summarized in table 3 and choices for each  
 353 model are shown in Supplementary table S9.

354 **Table 3**

355 **Summary of calibration approaches. Numbers are number of models with**  
 356 **indicated choice. The specific models associated with each choice are shown in**  
 357 **Supplementary tables S3 and S9. More information about the software is presented in**  
 358 **Supplementary table S10.**

359

| Number of parameters <sup>1</sup> | Minimum 1st Quartile Median Mean 3rd Quartile Maximum<br>1.00 2.00 3.00 3.63 4.50 9.00                                                                                                                                                                                                                                                                                                                                                                                                                                                       |
|-----------------------------------|----------------------------------------------------------------------------------------------------------------------------------------------------------------------------------------------------------------------------------------------------------------------------------------------------------------------------------------------------------------------------------------------------------------------------------------------------------------------------------------------------------------------------------------------|
| Which parameters                  | Thermal time to a single development stage 16<br>Thermal time to two or more development stages 6<br>Related to vernalization 11<br>Related to photoperiod 11<br>Related to effect of temperature (e.g. base temperature) 6<br>Related to phyllochron 6<br>Related to tiller appearance 2<br>Related to time to emergence 3<br>Parameters unrelated to calibration data <sup>2</sup> 6                                                                                                                                                       |
| Objective function                | Sum of squared errors or of root mean squared errors 21<br>Sum of absolute errors 2<br>Concentrated likelihood 1<br>No single explicit objective function 3                                                                                                                                                                                                                                                                                                                                                                                  |
| Software <sup>3</sup>             | Trial and error 10<br>DIRECT-L (Gablonsky & Kelley, 2001; Johnson, n.d.) 2<br>Ucode (E. P. Poeter, Hill, Banta, Mehl, & Christensen, 2005; Eileen P. Poeter & Hill, 1999) 3<br>DE Optim (Mullen, Ardia, Gil, Windover, & Cline, 2011) 3<br>PEST (Doherty, Hunt, & Tonkin, 2010) 2<br>SCE (Duan, Gupta, & Sorooshian, 1993; Houska, Kraft, Chamorro-Chavez, & Breuer, 2015) 2<br>GLUE (Beven & Binley, 2014; J. He, Jones, Graham, & Dukes, 2010) 1<br>DREAM (J. A. Vrugt et al., 2009; Jasper A. Vrugt, 2016) 2<br>Wrote code <sup>4</sup> 4 |

360 <sup>1</sup> Summary of number of estimated parameters for models M1-M27. <sup>2</sup> these are  
 361 parameters that do not affect simulated days to BBCH30 or BBCH55. <sup>3</sup> Some modeling  
 362 groups used more than one software package. <sup>4</sup> Modeling groups that wrote their own  
 363 software.

364

365 The choice of parameters to estimate was based on expert judgement in most cases.  
366 The participants declared that they chose parameters known to affect phenology in the model,  
367 or more specifically parameters expected to have a major effect on time to BBCH30 and  
368 BBCH55 and expected to differ between varieties. Five participants did a sensitivity analysis  
369 to aid in the choice of parameters to estimate. The number of estimated parameters ranged  
370 from 1 to 9. In almost all cases, the number of parameters to estimate was decided a priori. In  
371 three cases, the number was the result of testing the fit with different numbers of parameters.  
372 In one of those cases the Akaike Information Criteria (AIC, Akaike, 1973) and adjusted  $R^2$   
373 were used to test whether additional parameters should be estimated.

374 Almost all modeling groups estimated one or more parameters that represent thermal  
375 time between development stages (table 6). Some adjustments were necessary for models that  
376 did not explicitly calculate time of BBCH30 or BBCH55. In model M2, for example, a new  
377 parameter was added to the model, and estimated, representing the fraction of thermal time  
378 from double ridge to heading at which BBCH30 occurs. Thirteen groups estimated a  
379 parameter related to the effect of photoperiod. Ten groups estimated a parameter related to  
380 vernalization. Six groups modified one or more parameters related to the temperature  
381 response (for example model M6 estimated *Tbase*, the temperature below which there is no  
382 development). Only three models modified parameters related to the time from sowing to  
383 emergence, and only one model modified a parameter related to the effect of water stress. Six  
384 models included among the parameters to estimate, parameters that have no effect on the  
385 variables furnished as calibration data. Such parameters included thermal times for  
386 development stages after BBCH55, potential kernel growth rate, kernel number per stem  
387 weight and the temperature below which there is 50% death due to cold (Supplementary table  
388 S9).

389 Most modeling groups defined the sum of squared errors or the sum of root mean  
390 squared errors as the objective function to be minimized, where the sum is over the two  
391 stages. (In all cases, the calibration was done separately for the two varieties). Two groups  
392 minimized the sum of absolute errors. Calibration for model M21 was based on maximizing  
393 the concentrated likelihood (Seber & Wild, 1989) assuming a normal distribution of errors  
394 with possibly different error variances for the two development stages. In this case, the  
395 objective function involves a product of errors for the two outputs, rather than a sum. Four of  
396 the participants (M15, M16, M17, M18) did not define an explicit objective function to be  
397 minimized. In these cases, the parameter values were chosen to obtain a “good fit” to the data  
398 by visual inspection. Finally, two of the models (M7, M8) divided the calibration into two  
399 steps. In these cases three of the parameters were used to fit the BBCH30 data, and then in  
400 another step another parameter was used to fit the BBCH55 data.

401 Minimizing the sum of squared errors is a standard statistical approach to model  
402 calibration, which has highly desirable properties if certain assumptions about model error are  
403 satisfied, including equal variance of model error for all data points and non-correlation of  
404 model errors. Only one model took into account the possibility that the error variances are  
405 different for BBCH30 and BBCH55, and none of the modeling groups took into account  
406 possible correlations between errors for BBCH30 and BBCH55 in the same field. Based on  
407 the errors for all the data and all the models, it was found that there is a highly significant  
408 difference in variance between errors for BBCH30 (variance of error 100.7 days<sup>2</sup>) and  
409 BBCH55 (variance of error 67.3 days<sup>2</sup>). Also, the correlation between the error for BBCH30  
410 and the error for BBCH55 in the same field is 0.53 and highly significant. However, if only  
411 results for a single model are considered, then for most models the differences in variance and  
412 the correlation are not significant.

413 Two models defined a posterior probability of the parameters equal to the likelihood  
414 times the prior probability, as usually assumed in a Bayesian approach. The parameters used  
415 for prediction were those that maximized the posterior probability (i.e., the estimated mode of  
416 the posterior distribution). In both cases, the likelihood was assumed Gaussian with  
417 independent errors, and the prior distribution was assumed uniform between some minimum  
418 and maximum value. This approach is equivalent to minimizing the mean squared error, with  
419 constraints on the parameter values.

420 Seven participants simply used trial and error to search for the optimal parameters.  
421 The other participants used software specifically adapted to minimizing the objective  
422 function, either written specifically for their model or, in most cases, available from other  
423 sources (Supplementary table S10).

424

## 425 Discussion

426 The challenge in this study was to predict the time from sowing to beginning of stem  
427 elongation and to heading in winter wheat field trials performed across France. This is a  
428 problem of practical importance, since these two development stages are important for wheat  
429 management (e.g. fertilization). The evaluation concerned years and sites not included in the  
430 calibration data, making this one of the most rigorous evaluations to date of how well crop  
431 models simulate phenology.

432 Twenty-seven modeling groups participated in the exercise. Most models predicted  
433 times to stem elongation and heading quite well (median MAE of 6 days). Half the models  
434 had MSE values of prediction that were 36% or less than MSE of a naive predictor. It must be  
435 kept in mind that this study is a rather favorable situation for prediction, with a substantial  
436 amount of calibration data and predictions for environments similar to those of the calibration  
437 data.

438 The results for each individual model depend on the model equations, the values of the  
439 fixed parameters and the calibration approach which determines the values of the estimated  
440 parameters, and on the interactions among those elements. A full, detailed analysis of each  
441 model is beyond the objectives of this study. We focused on the calibration approaches used  
442 and its relation to errors for the calibration and evaluation data.

443 The results show that calibration can, in some cases, compensate for differences in  
444 model equations and/or values of fixed parameters. Compensation is usually discussed in the  
445 context of single models. For example, equifinality, which is a well-known phenomenon of  
446 complex models, means that different combinations of parameter values, and thus different  
447 quantitative descriptions of processes, can lead to the same results for outputs because there is  
448 compensation between the processes (Beven, 2006; D. He et al., 2017). However, this  
449 phenomenon has not been described in the context of multi-model studies. Here, we have an  
450 example of compensation for differences between models in the way they partition days from  
451 sowing to BBCH30 into days from sowing to emergence plus days from emergence to  
452 BBCH30. Models with longer simulated times from sowing to emergence tend to have a  
453 shorter simulated time from emergence to development stage BBCH30 and vice versa. In fact,  
454 each extra day from sowing to emergence is associated on average with almost exactly one  
455 less day from emergence to BBCH30. The result is that models with quite different simulated  
456 days from sowing to emergence can have nearly identical times from sowing to BBCH30.  
457 This can be expressed in terms of model uncertainty, as quantified by between-model

458 variance. The variance of days from sowing to BBCH30 is less than the sum of variances of  
459 days from sowing to emergence and days from emergence to BBCH30. That is, calibration  
460 reduces, but does not eliminate, model uncertainty for the variable provided for calibration.

461 We don't have observed time to emergence, but in any case the models with different  
462 simulated days to emergence can't all be right. This is an example of how models can get the  
463 right answer (correct days to BBCH30) for the wrong reasons (wrong days to emergence),  
464 illustrating the problem pointed out for example by (Challinor, Martre, Asseng, Thornton, &  
465 Ewert, 2014). The same compensation of errors between sowing to emergence and emergence  
466 to BBCH30 will not be appropriate for all environments. This is one of the main reasons that  
467 extrapolation to populations different than the training population is dangerous.

468 Another indication of compensation induced by calibration is the fact that after  
469 calibration, models with quite different choices for the variables that affect development can  
470 have very similar levels of prediction error. The most important inputs that determine spring  
471 wheat phenology are daily temperature and photoperiod (Aslam et al., 2017) and for winter  
472 wheat it is also necessary to include the process of vernalization, i.e. the effect of low winter  
473 temperatures on development (Li et al., 2013). Five of the best eight predicting models here,  
474 with  $MSE_{eval}^{all} < 40 \text{ days}^2$ , do use all three of those variables (daily temperature, photoperiod,  
475 vernalizing temperatures) as inputs. Two of the best eight models however do not use  
476 vernalizing temperatures, and one of those best eight does not use photoperiod. The choice  
477 of input variables is a fundamental aspect of model structure. In fact, MSE can be expressed  
478 as a sum of two terms, the first of which depends only on the choice of the model input  
479 variables and not on any other aspects of structure, while the second measures the distance  
480 between the model used and the optimal model for those inputs (Wallach, Makowski, Jones,  
481 & Brun, 2019). It seems that calibration can lead to similar values of MSE for prediction even  
482 for quite different choices of input variables.

483 While models with different structures can give similar results thanks to calibration,  
484 our results also show that models with the same structure can provide different results, if  
485 different calibration approaches are used. This is illustrated here by the results for two groups  
486 of models sharing the same structure. There are major differences in prediction error between  
487 models with the same structure depending on how calibration was done. Much previous work  
488 on improving the predictive capability of crop models has focused on the model equations, for  
489 instance the way temperature is taken into account in various processes (Maiorano et al.,  
490 2016; Wang et al., 2017). Here we show that models with quite different structures can have  
491 very similar prediction accuracy, thanks to calibration using the same data, while models with  
492 the same model structure can have very different levels of prediction error, if the calibration  
493 methods differ. This means that model comparison studies may often be comparing  
494 calibration approaches as much or more as they are comparing model equations. This is in  
495 line with the conclusions of Confalonieri et al. (2016), who argued that one should not speak  
496 of evaluation of a model but rather of a model-user combination; a major role of the user is in  
497 determining the method of calibration.

498 The choice of objective function for calibration can have an effect on quality of  
499 prediction. While most participants defined an explicit objective function (e.g. minimizing  
500 sum of squared errors, or some closely related criterion) three models (see Supplementary  
501 table S9) did not have an explicit quantitative objective function. Those models all had  
502 relatively large values of overall MSE for the evaluation data ( $MSE_{eval}^{all}$ ), having 15th, 16th,  
503 and 18<sup>th</sup> largest  $MSE_{eval}^{all}$  values out of the 25 models that predicted both BBCH30 and

504 BBCH55. These results suggest that the lack of a quantitative objective function can be a  
505 drawback since then one does not have a clear criterion for judging the results of calibration.

506 There was a large diversity of choices of parameters to estimate by calibration, and  
507 this had in certain cases an important effect on prediction error. One rather unexpected  
508 observation was that several participants included parameters that have no effect on the  
509 variables furnished as calibration data among the parameters to estimate. The data cannot in  
510 those cases give any information about the parameter value. At best, including such  
511 parameters among the parameters to estimate is useless, and those parameters will simply  
512 have final values exactly equal to their initial values. However, there may also be serious  
513 disadvantages to including such parameters. It gives the erroneous impression that one is  
514 estimating parameters that cannot in fact be estimated, it increases computation time and it  
515 can cause problems for the parameter estimation algorithm. The very poor fit of model M5 to  
516 the calibration data seems to be directly related to the fact that for this model, several  
517 parameters unrelated to the calibration data were chosen to be fitted. The software used here  
518 was PEST (Doherty et al., 2010), with the singular value decomposition option, which allows  
519 one to deal with non-estimable parameters, but at the cost of introducing bias in the estimated  
520 parameter values. Obviously, one should not include non-estimable parameters among the  
521 parameters to estimate.

522 The choice of parameters to estimate may be the principal cause of bias in fitting the  
523 calibration data for some models. If a model includes an additive constant term, and squared  
524 error is minimized, bias will be 0 for the calibration data. Even for more complex models,  
525 calibration can bring bias close to 0, as illustrated here by the fact that many of the models  
526 had very small biases for the calibration data. Eliminating bias is important, since squared  
527 bias is one component of MSE, and therefore the bias necessarily adds on to MSE (Kobayashi  
528 & Salam, 2000). If one does not have a parameter with a nearly additive effect for each of the  
529 development stages BBCH30 and BBCH55, the elimination of bias for both outputs is not  
530 assured. Model M24 estimated only a single parameter. In such a case, at best one can  
531 estimate a parameter value that gives the best compromise between errors in BBCH30 and  
532 BBCH55. This may lead to a negative bias for one of those outputs and more or less  
533 corresponding positive bias for the other. This is exactly the behavior illustrated in figure 2.  
534 Model M10 also had fairly large biases. Here three parameters were estimated, but one is  
535 unrelated to the observed data and a second concerns time to emergence, which was only  
536 allowed to vary in a limited range. Apparently in this case also there was not enough  
537 flexibility to eliminate bias for both development stages. Models with large bias for the  
538 calibration data tended to have large MSE values for the evaluation data (Supplementary  
539 figure S2). This suggests that the parameters to estimate should include one parameter that is  
540 nearly additive (i.e. that adds an amount that is nearly the same for all environments) for each  
541 observed output, and that is not too limited in the allowed range of values.

542 The calibration choices here suggest other recommendations for calibration. One  
543 concerns the specific choice for the objective function. Among the models that defined a  
544 likelihood or a sum of squares criterion, all but one assumed that all model errors had equal  
545 variance and were independent. One should probably take into account unequal variances and  
546 correlation of simulation errors for BBCH30 and BBCH55 in the same field. A second  
547 recommendation concerns the software. There does not seem to be any clear connection  
548 between the software used for calibration and the predictive quality of the resulting calibrated  
549 model. Various different software solutions were used by the best predicting models, but  
550 largely the same software solutions were also found among the models with the largest  
551 prediction errors. A problem that may arise concerns the test for convergence to the parameter



552 values that minimize the chosen objective function. Having such a test allows the user to have  
553 confidence that the best parameter values have been found. With trial and error, there is no  
554 such test, which is a major drawback of this approach. Algorithms to estimate a Bayesian  
555 posterior distribution normally test convergence to the posterior distribution, which may not  
556 be relevant if one is using just the mode of the distribution. It would be good practice to adopt  
557 a software option that includes an appropriate test of convergence.

558 Overall, we have shown in a rigorous evaluation of prediction for new environments  
559 that most of the 27 crop models tested, given calibration data, provide good predictions of  
560 phenology in winter wheat and explain much of the variability between environments.  
561 Calibration has a major effect on predictive quality. Calibration reduces variability between  
562 models for outputs used for calibration, but may lead to models getting the right answer for  
563 the wrong reason. Calibration can compensate to some extent for different choices of input  
564 variables. Poor practices of calibration can seriously degrade predictive capability. Arguably  
565 the most difficult aspect of calibration, and yet the least studied, is the choice of parameters to  
566 estimate. Unlike the choice of objective function and of software, there is little guidance here  
567 from other fields. Furthermore, the problem is specific to each model, since each model has a  
568 different set of parameters. Given the large diversity of calibration approaches and the  
569 importance of calibration, there is a clear need for guidelines and tools to aid model users with  
570 respect to calibration. Model applications, including model studies of climate change impact,  
571 should focus more on the data used for calibration and on the calibration methods employed.

## 572 Acknowledgements

573 All authors of this manuscript disclose any potential sources of conflict of interest. This work  
574 was in part supported by the Collaborative Research Center 1253 CAMPOS (Project 7:  
575 Stochastic Modelling Framework), funded by the German Research Foundation (DFG, Grant  
576 Agreement SFB 1253/1 2017), the Academy of Finland through projects AI-CropPro  
577 (316172) and DivCSA (316215) and Natural Resources Institute Finland (Luke) through a  
578 strategic project BoostIA, the BonaRes project "Soil3" (BOMA 03037514) of the Federal  
579 Ministry of Education and Research (BMBF), Germany, the project BiomassWeb of the  
580 GlobeE programme (Grant number: FKZ031A258B) funded by the Federal Ministry of  
581 Education and Research (BMBF, Germany), the INRA ACCAF meta-programme, the  
582 German Federal Ministry of Education and Research (BMBF) in the framework of the  
583 funding measure "Soil as a Sustainable Resource for the Bioeconomy – BonaRes", project  
584 "BonaRes (Module B): BonaRes Centre for Soil Research, subproject B" (grant 031B0511B),  
585 the National Key Research and Development Program of China (2017YFD0300205), the  
586 National Science Foundation for Distinguished Young Scholars (31725020), the Priority  
587 Academic Program Development of Jiangsu Higher Education Institutions (PAPD), the 111  
588 project (B16026), and China Scholarship Council, the Agriculture and Agri-Food Canada's  
589 Project 1387 under the Canadian Agricultural Partnership, the DFG Research Unit FOR 1695  
590 'Agricultural Landscapes under Global Climate Change – Processes and Feedbacks on a  
591 Regional Scale, the U.S. Department of Agriculture National Institute of Food and  
592 Agriculture (award no. 2015-68007-23133) and USDA/NIFA HATCH grant N. MCL02368,  
593 the National Key Research and Development Program of China (2016YFD0300105), The  
594 Broadacre Agriculture Initiative, a research partnership between University of Southern  
595 Queensland and the Queensland Department of Agriculture and Fisheries, , the Academy of  
596 Finland through project AI-CropPro (315896), the JPI FACCE MACSUR2 project, funded by  
597 the Italian Ministry for Agricultural, Food, and Forestry Policies (D.M. 24064/7303/15 of  
598 26/Nov/2015). The order in which the donors are listed is arbitrary.  
599



## References

- 600  
601
- 602 Akaike, H. (1973). Information Theory and an Extension of the Maximum Likelihood  
603 Principle. In B. N. Petrov & F. Csaki (Eds.), *In B. N. Petrov, & F. Csaki (Eds.),*  
604 *Proceedings of the 2nd International Symposium on Information Theory* (pp. 267–281).  
605 Budapest: Akademiai Kiado.
- 606 Andarzian, B., Hoogenboom, G., Bannayan, M., Shirali, M., & Andarzian, B. (2015).  
607 Determining optimum sowing date of wheat using CSM-CERES-Wheat model. *Journal*  
608 *of the Saudi Society of Agricultural Sciences*, 14(2), 189–199.  
609 <https://doi.org/10.1016/J.JSSAS.2014.04.004>
- 610 Aslam, M. A., Ahmed, M., Stöckle, C. O., Higgins, S. S., Hassan, F. ul, & Hayat, R. (2017).  
611 Can Growing Degree Days and Photoperiod Predict Spring Wheat Phenology? *Frontiers*  
612 *in Environmental Science*, 5, 57. <https://doi.org/10.3389/fenvs.2017.00057>
- 613 Asseng, S., Ewert, F., Martre, P., Rötter, R. P., Lobell, D. B., Cammarano, D., ... Zhu, Y.  
614 (2015). Rising temperatures reduce global wheat production. *Nature Climate Change*,  
615 5(2), 143–147. <https://doi.org/10.1038/nclimate2470>
- 616 Asseng, Senthold, Martre, P., Maiorano, A., Rötter, R. P., O’Leary, G. J., Fitzgerald, G. J., ...  
617 Ewert, F. (2019). Climate change impact and adaptation for wheat protein. *Global*  
618 *Change Biology*, 25(1), 155–173. <https://doi.org/10.1111/gcb.14481>
- 619 Beven, K. (2006). A manifesto for the equifinality thesis. *Journal of Hydrology*, 320(1–2),  
620 18–36.
- 621 Beven, K., & Binley, A. (2014). GLUE: 20 years on. *Hydrological Processes*, 28(24), 5897–  
622 5918. <https://doi.org/10.1002/hyp.10082>
- 623 Bindi, M., Palosuo, T., Trnka, M., & Semenov, M. (2015). Modelling climate change impacts  
624 on crop production for food security. *Climate Research*, 65(September), 3–5.  
625 <https://doi.org/10.3354/cr01342>
- 626 Campbell, B. M., Hansen, J., Rioux, J., Stirling, C. M., Twomlow, S., & (Lini) Wollenberg,  
627 E. (2018). Urgent action to combat climate change and its impacts (SDG 13):  
628 transforming agriculture and food systems. *Current Opinion in Environmental*  
629 *Sustainability*, 34, 13–20. <https://doi.org/10.1016/J.COSUST.2018.06.005>
- 630 Carberry, P. S., Liang, W., Twomlow, S., Holzworth, D. P., Dimes, J. P., McClelland, T., ...  
631 Keating, B. A. (2013). Scope for improved eco-efficiency varies among diverse cropping  
632 systems. *Proceedings of the National Academy of Sciences of the United States of*  
633 *America*, 110(21), 8381–8386. <https://doi.org/10.1073/pnas.1208050110>
- 634 Challinor, A., Martre, P., Asseng, S., Thornton, P., & Ewert, F. (2014). Making the most of  
635 climate impacts ensembles. *Nature Climate Change*, 4(2), 77–80.  
636 <https://doi.org/10.1038/nclimate2117>
- 637 Confalonieri, R., Orlando, F., Paleari, L., Stella, T., Gilardelli, C., Movedi, E., ... Acutis, M.  
638 (2016). Uncertainty in crop model predictions: What is the role of users? *Environmental*  
639 *Modelling & Software*, 81, 165–173. <https://doi.org/10.1016/j.envsoft.2016.04.009>
- 640 Doherty, J. E., Hunt, R. J., & Tonkin, M. J. (2010). *Approaches to highly parameterized*  
641 *inversion: A guide to using PEST for model-parameter and predictive-uncertainty*

- 642 *analysis: U.S. Geological Survey Scientific Investigations Report 2010–5211*. Retrieved  
643 from <http://pubs.usgs.gov/sir/2010/5211>
- 644 Duan, Q. Y., Gupta, V. K., & Sorooshian, S. (1993). Shuffled complex evolution approach for  
645 effective and efficient global minimization. *Journal of Optimization Theory and*  
646 *Applications*, 76(3), 501–521. <https://doi.org/10.1007/BF00939380>
- 647 Gablonsky, J. M., & Kelley, C. T. (2001). A Locally-Biased form of the DIRECT Algorithm.  
648 *Journal of Global Optimization*, 21(1), 27–37. <https://doi.org/10.1023/A:1017930332101>
- 649 Godfray, H. C. J., Beddington, J. R., Crute, I. R., Haddad, L., Lawrence, D., Muir, J. F., ...  
650 Toulmin, C. (2010). Food security: the challenge of feeding 9 billion people. *Science*  
651 *(New York, N.Y.)*, 327(5967), 812–818. <https://doi.org/10.1126/science.1185383>
- 652 He, D., Wang, E., Wang, J., Lilley, J., Luo, Z., Pan, X., ... Yang, N. (2017). Uncertainty in  
653 canola phenology modelling induced by cultivar parameterization and its impact on  
654 simulated yield. *Agricultural and Forest Meteorology*, 232, 163–175.  
655 <https://doi.org/10.1016/j.agrformet.2016.08.013>
- 656 He, J., Jones, J. W., Graham, W. D., & Dukes, M. D. (2010). Influence of likelihood function  
657 choice for estimating crop model parameters using the generalized likelihood uncertainty  
658 estimation method. *Agricultural Systems*, 103(5), 256–264.  
659 <https://doi.org/10.1016/j.agsy.2010.01.006>
- 660 Hochman, Z., Gobbett, D. L., & Horan, H. (2017). Climate trends account for stalled wheat  
661 yields in Australia since 1990. *Global Change Biology*, 23(5), 2071–2081.  
662 <https://doi.org/10.1111/gcb.13604>
- 663 Houska, T., Kraft, P., Chamorro-Chavez, A., & Breuer, L. (2015). SPOTting Model  
664 Parameters Using a Ready-Made Python Package. *PLOS ONE*, 10(12), e0145180.  
665 <https://doi.org/10.1371/journal.pone.0145180>
- 666 Hunt, J. R., Lilley, J. M., Trevaskis, B., Flohr, B. M., Peake, A., Fletcher, A., ... Kirkegaard,  
667 J. A. (2019). Early sowing systems can boost Australian wheat yields despite recent  
668 climate change. *Nature Climate Change*, 9(3), 244–247. [https://doi.org/10.1038/s41558-](https://doi.org/10.1038/s41558-019-0417-9)  
669 [019-0417-9](https://doi.org/10.1038/s41558-019-0417-9)
- 670 Hussain, J., Khaliq, T., Ahmad, A., & Akhtar, J. (2018). Performance of four crop model for  
671 simulations of wheat phenology, leaf growth, biomass and yield across planting dates.  
672 *PLOS ONE*, 13(6), e0197546. <https://doi.org/10.1371/journal.pone.0197546>
- 673 IPCC. (2014). *Climate Change 2014: Synthesis Report. Contribution of Working Groups I, II*  
674 *and III to the Fifth Assessment Report of the Intergovernmental Panel on Climate*  
675 *Change*. (P. K. Pachauri & A. Meyer, Eds.). Geneva: IPCC.
- 676 Johnson, S. G. (n.d.). The NLOpt nonlinear-optimization package.
- 677 Kobayashi, K., & Salam, M. U. (2000). Comparing simulated and measured values using  
678 mean squared deviation and its components. *Agronomy Journal*, 92, 345–352.
- 679 Li, G., Yu, M., Fang, T., Cao, S., Carver, B. F., & Yan, L. (2013). Vernalization requirement  
680 duration in winter wheat is controlled by TaVRN-A1 at the protein level. *The Plant*  
681 *Journal: For Cell and Molecular Biology*, 76(5), 742–753.  
682 <https://doi.org/10.1111/tpj.12326>

- 683 Maiorano, A., Martre, P., Asseng, S., Ewert, F., Müller, C., Rötter, R. P., ... Zhu, Y. (2017).  
684 Crop model improvement reduces the uncertainty of the response to temperature of  
685 multi-model ensembles. *Field Crops Research*, 202.  
686 <https://doi.org/10.1016/j.fcr.2016.05.001>
- 687 Maiorano, Andrea, Martre, P., Asseng, S., Ewert, F., Müller, C., Rötter, R. P., ... Zhu, Y.  
688 (2016). Crop model improvement reduces the uncertainty of the response to temperature  
689 of multi-model ensembles. *Field Crops Research*.  
690 <https://doi.org/10.1016/j.fcr.2016.05.001>
- 691 Mullen, K., Ardia, D., Gil, D., Windover, D., & Cline, J. (2011). “DEoptim”: An R Package  
692 for Global Optimization by Differential Evolution. *Journal of Statistical Software*, 40, 1–  
693 26.
- 694 Parry, M. ., Rosenzweig, C., Iglesias, A., Livermore, M., & Fischer, G. (2004). Effects of  
695 climate change on global food production under SRES emissions and socio-economic  
696 scenarios. *Global Environmental Change*, 14(1), 53–67.  
697 <https://doi.org/10.1016/j.gloenvcha.2003.10.008>
- 698 Piao, S., Liu, Q., Chen, A., Janssens, I. A., Fu, Y., Dai, J., ... Zhu, X. (2019). Plant phenology  
699 and global climate change: current progresses and challenges. *Global Change Biology*,  
700 gcb.14619. <https://doi.org/10.1111/gcb.14619>
- 701 Poeter, E. P., Hill, M. C., Banta, E. R., Mehl, S., & Christensen, S. (2005). *UCODE\_2005 and*  
702 *Six Other Computer Codes for Universal Sensitivity Analysis, Calibration, and*  
703 *Uncertainty Evaluation: U.S. Geological Survey Techniques and Methods 6-A11.*
- 704 Poeter, Eileen P., & Hill, M. C. (1999). UCODE, a computer code for universal inverse  
705 modeling. *Computers & Geosciences*, 25(4), 457–462. [https://doi.org/10.1016/S0098-](https://doi.org/10.1016/S0098-3004(98)00149-6)  
706 [3004\(98\)00149-6](https://doi.org/10.1016/S0098-3004(98)00149-6)
- 707 Porter, J. R., Howden, M., & Smith, P. (2017). Considering agriculture in IPCC assessments.  
708 *Nature Climate Change*, 7(10), 680–683. <https://doi.org/10.1038/nclimate3404>
- 709 Rezaei, E. E., Siebert, S., & Ewert, F. (2015). Intensity of heat stress in winter wheat—  
710 phenology compensates for the adverse effect of global warming. *Environmental*  
711 *Research Letters*, 10(2), 024012. <https://doi.org/10.1088/1748-9326/10/2/024012>
- 712 Rezaei, E. E., Siebert, S., Hüging, H., & Ewert, F. (2018). Climate change effect on wheat  
713 phenology depends on cultivar change. *Scientific Reports*, 8(1), 4891.  
714 <https://doi.org/10.1038/s41598-018-23101-2>
- 715 Seber, G. A. F., & Wild, C. J. (1989). *Nonlinear regression*. New York: Wiley .
- 716 Seidel, S. J., Palosuo, T., Thorburn, P., & Wallach, D. (2018). Towards improved calibration  
717 of crop models – Where are we now and where should we go? *European Journal of*  
718 *Agronomy*, 94, 25–35. <https://doi.org/10.1016/J.EJA.2018.01.006>
- 719 Svystun, T., Bhalerao, R. P., & Jönsson, A. M. (2019). Modelling Populus autumn phenology:  
720 The importance of temperature and photoperiod. *Agricultural and Forest Meteorology*,  
721 271, 346–354. <https://doi.org/10.1016/J.AGRFORMET.2019.03.003>
- 722 Vrugt, J. A., ter Braak, C. J. F., Diks, C. G. H., Robinson, B. A., Hyman, J. M., & Higdon, D.  
723 (2009). Accelerating Markov Chain Monte Carlo Simulation by Differential Evolution  
724 with Self-Adaptive Randomized Subspace Sampling. *International Journal of Nonlinear*

- 725        *Sciences and Numerical Simulation*, 10(3).  
726        <https://doi.org/10.1515/IJNSNS.2009.10.3.273>
- 727        Vrugt, Jasper A. (2016). Markov chain Monte Carlo simulation using the DREAM software  
728        package: Theory, concepts, and MATLAB implementation. *Environmental Modelling &*  
729        *Software*, 75, 273–316. <https://doi.org/10.1016/J.ENVSOFT.2015.08.013>
- 730        Wallach, D., Makowski, D., Jones, J. W., & Brun, F. (2019). *Working with Dynamic Crop*  
731        *Models: Methods, Tools and examples for Agriculture and Environment*. London, U.K.:  
732        Academic Press.
- 733        Wang, E., Martre, P., Zhao, Z., Ewert, F., Maiorano, A., Rötter, R. P., ... Asseng, S. (2017).  
734        The uncertainty of crop yield projections is reduced by improved temperature response  
735        functions. *Nature Plants*, 3. <https://doi.org/10.1038/nplants.2017.102>
- 736        Went, F. W. (2003). The Effect of Temperature on Plant Growth. *Annual Review of Plant*  
737        *Physiology*, 4(1), 347–362. <https://doi.org/10.1146/annurev.pp.04.060153.002023>
- 738        Wheeler, T., & von Braun, J. (2013). Climate change impacts on global food security. *Science*  
739        (*New York, N.Y.*), 341(6145), 508–513. <https://doi.org/10.1126/science.1239402>
- 740        Yuan, S., Peng, S., & Li, T. (2017). Evaluation and application of the ORYZA rice model  
741        under different crop managements with high-yielding rice cultivars in central China.  
742        *Field Crops Research*, 212, 115–125. <https://doi.org/10.1016/J.FCR.2017.07.010>
- 743        Zadoks, J. C., Chzang, T. T., & Konzak, C. F. (1974). A decimal code for the growth stages  
744        of cereals. *Weed Research*, 14(6), 415–421. [https://doi.org/10.1111/j.1365-](https://doi.org/10.1111/j.1365-3180.1974.tb01084.x)  
745        [3180.1974.tb01084.x](https://doi.org/10.1111/j.1365-3180.1974.tb01084.x)
- 746
- 747
